# Supplementary material for: The Relationship between Dietary Patterns and High Blood Glucose among Adults Based on Structural Equation Modelling
Source: MDPI journal article supplement (doi:10.3390/nu14194111), 2022-10-03
Supplement: s1 [file s1]

Supplementary Table S1. Food Groupings Used in Factor Analysis.

| Food group                 | Example of food items                                     |
|----------------------------|-----------------------------------------------------------|
| Main grains                | Rice and wheat and their products                         |
| Other grains               | Corn, barley, buckwheat                                   |
| Vegetables                 | Spinach, canola, carrot, Chinese cabbage, potato, onion   |
| Red meats and its products | Pork, beef, lamb and those products                       |
| Eggs                       | Whole eggs, yolk, preserved eggs                          |
| Fruits                     | Fresh and canned (no added sugar) fruits                  |
| Condiments                 | Sauce, vinegar, salt, preserved vegetables                |
| Soy products               | Soybeans, soymilk, tofu                                   |
| Milk and its products      | Whole milk, skim milk, flavored milk, cheese, yogurt      |
| Seafood                    | Fresh fish, dried fish, shellfish, shrimp                 |
| Nuts and seeds             | Sesame, sunflower, peanuts, walnuts, hazelnuts, pine-nuts |
| Beverages                  | Fruit or flavored drinks, fruit juice, soft drinks        |
| Alcoholic beverages        | Beer, rice wine, white wine                               |
| Pastry snacks              | Cakes, pancake, mooncake                                  |
| Animal oils                | Butter, lard, sheep oil                                   |
| Poultry                    | Chicken, duck meat                                        |
| Vegetable oils             | Colza oil, soybean oil, peanut oil, rapeseed oil          |
| Tuber and starches         | Tubers and starches                                       |
| Sugars and preserves       | Sugars, confectionery, preserves                          |
| Dry legumes                | Mung beans, adzuki lentils, kidney beans                  |
| Animal viscera             | Viscera products of animals                               |
| Fungi and algae            | Fungus and algae                                          |

Supplementary Table S2. Factor Loadings for three Dietary Patterns Derived from Factor Analysis.

| Food group                 | Modern dietary pattern | Fruit-milk dietary pattern |
|----------------------------|------------------------|----------------------------|
| Red meats and its products | 0.615                  |                            |
| Vegetables                 | 0.584                  |                            |
| Seafood                    | 0.465                  |                            |
| Condiments                 | 0.430                  |                            |
| Fungi and algae            | 0.347                  | 0.272                      |
| Whole grains               | -0.341                 | 0.253                      |
| Main grains                | 0.338                  | -0.304                     |
| Poultry                    | 0.285                  |                            |
| Tuber and starches         | -0.258                 |                            |
| Sugars and preserves       |                        |                            |
| Animal viscera             |                        |                            |
| Wine                       |                        |                            |
| Milk and its products      |                        | 0.638                      |
| Fruits                     |                        | 0.601                      |
| Eggs                       | 0.311                  | 0.474                      |
| Nuts and seeds             |                        | 0.407                      |
| Pastry snacks              |                        | 0.332                      |
| Vegetable oils             |                        | -0.323                     |
| Soy products               |                        |                            |
| Animal oils                |                        |                            |
| Dry legumes                |                        |                            |
| Beverages                  |                        |                            |
